# Supplementary material for: Acremonium terricola Culture’s Dose–Response Effects on Lactational Performance, Antioxidant Capacity, and Ruminal Characteristics in Holstein Dairy Cows
Source: MDPI journal article supplement (doi:10.3390/antiox11010175), 2022-01-17
Supplement: s1 [file s1]

**Supplementary Table S2** Ingredients and nutrient composition of the experiment diet

| Items                                               | Value |
|-----------------------------------------------------|-------|
| Ingredient, % of dry matter                         |       |
| Alfalfa                                             | 9.34  |
| Whole corn silage                                   | 25.21 |
| Alfalfa silage                                      | 2.12  |
| Flaked corn                                         | 17.82 |
| Corn                                                | 12.73 |
| Soybean meal                                        | 15.28 |
| Soybean hull                                        | 4.24  |
| corn gluten meal                                    | 2.55  |
| Cottonseed                                          | 6.37  |
| Fat power                                           | 1.27  |
| Ca(HCO <sub>3</sub> ) <sub>2</sub>                  | 0.64  |
| Molasses                                            | 1.05  |
| 5% Premix                                           | 1.38  |
| Chemical composition <sup>1</sup> , % of dry matter |       |
| Dry matter, % as fed                                | 48.90 |
| Ether extract                                       | 5.03  |
| Crude protein                                       | 15.18 |
| Neutral detergent fibre                             | 31.59 |
| Acid detergent fibre                                | 17.63 |

<sup>1</sup> All contents were measured value.
