# Supplementary material for: Acremonium terricola Culture’s Dose–Response Effects on Lactational Performance, Antioxidant Capacity, and Ruminal Characteristics in Holstein Dairy Cows
Source: MDPI journal article supplement (doi:10.3390/antiox11010175), 2022-01-17
Supplement: s1 [file s1]

**Supplementary Table S1** Functional composition of *Acremonium terricola* cultures, dry matter basis

| Items                        | Value, % |
|------------------------------|----------|
| Dry matter (% air dry basis) | 94.40    |
| Ether extract                | 3.06     |
| Crude protein                | 24.53    |
| D-mannitol                   | 84.50    |
| Galactomannan                | 44.60    |
| 3'-deoxyadenosine            | 0.43     |
| Ergosterol                   | 0.60     |
| Total amino acids            | 17.27    |
| Aspartic acid                | 1.79     |
| Threonine                    | 0.72     |
| Serine                       | 0.82     |
| Glutamic acid                | 3.30     |
| Proline                      | 1.50     |
| Glycine                      | 0.76     |
| Alanine                      | 0.97     |
| Cystine                      | 0.29     |
| Valine                       | 0.90     |
| Methionine                   | 0.26     |
| Isoleucine                   | 0.74     |
| Leucine                      | 1.49     |
| Tyrosine                     | 0.36     |
| Phenylalanine                | 0.88     |
| Lysine                       | 0.92     |
| Histidine                    | 0.46     |
| Arginine                     | 1.11     |
