# Supplementary material for: Acremonium terricola Culture’s Dose–Response Effects on Lactational Performance, Antioxidant Capacity, and Ruminal Characteristics in Holstein Dairy Cows
Source: MDPI journal article supplement (doi:10.3390/antiox11010175), 2022-01-17
Supplement: s1 [file s1]

**Supplementary Table S3.** Sample information and sequencing statistics

| Groups  | Days, d | Number of sequences | Good's coverage, % |
|---------|---------|---------------------|--------------------|
| 0 g/d   | 0       | 53408 ± 7466        | 99.05 ± 0.07       |
|         | 90      | 56622 ± 6309        | 99.22 ± 0.08       |
| 30 g/d  | 0       | 56006 ± 5785        | 99.07 ± 0.11       |
|         | 90      | 53420 ± 3163        | 99.12 ± 0.06       |
| 60 g/d  | 0       | 57964 ± 4083        | 99.11 ± 0.08       |
|         | 90      | 52988 ± 2973        | 99.19 ± 0.10       |
| 300 g/d | 0       | 57537 ± 4028        | 99.15 ± 0.04       |
|         | 90      | 56076 ± 4152        | 99.25 ± 0.06       |
